# Supplementary material for: Suppression of breast cancer-associated bone loss with osteoblast proteomes via Hsp90ab1/moesin-mediated inhibition of TGFβ/FN1/CD44 signaling
Source: Theranostics. 2022 Jan 1;12(2):929–43. doi: 10.7150/thno.66148 (PMC8692912; doi:10.7150/thno.66148)
Supplement: Supplementary file 1 — Supplementary figures. [file thnov12p0929s1.pdf]

## Supplementary materials

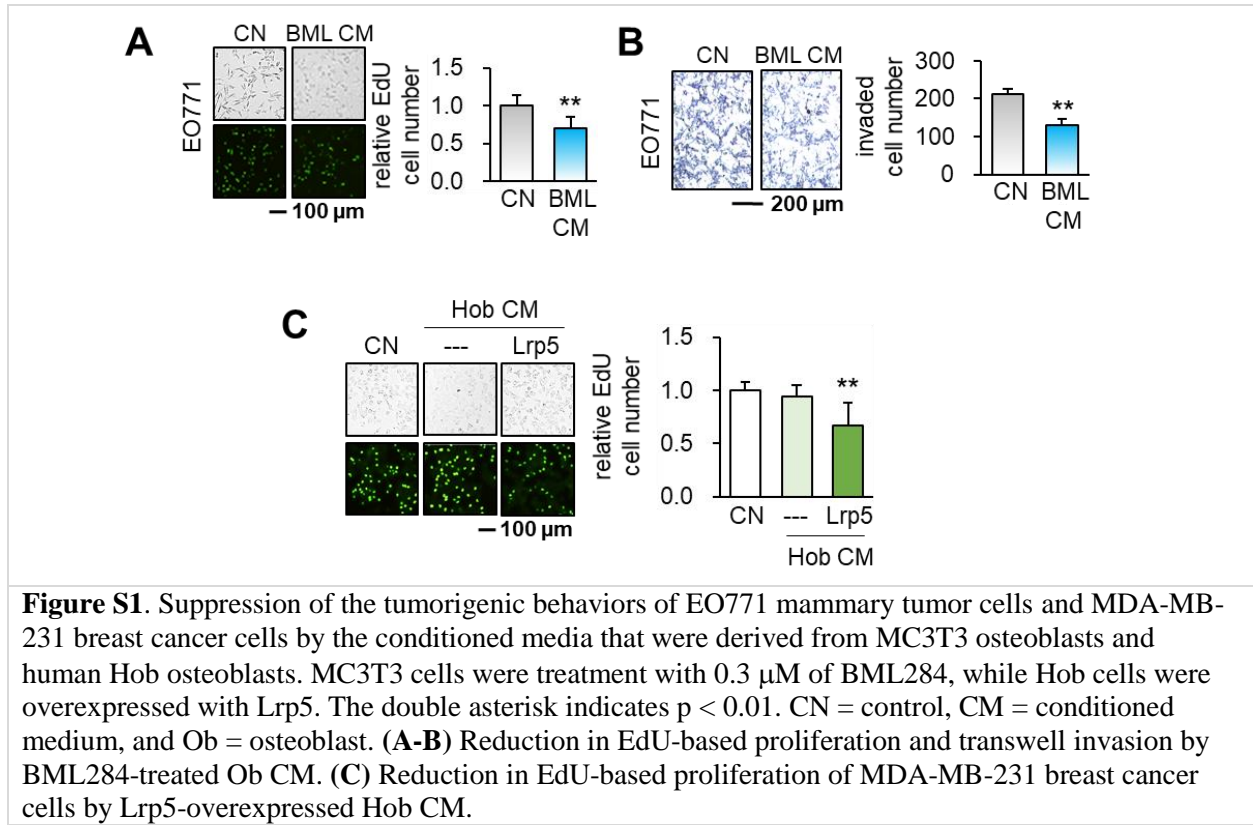

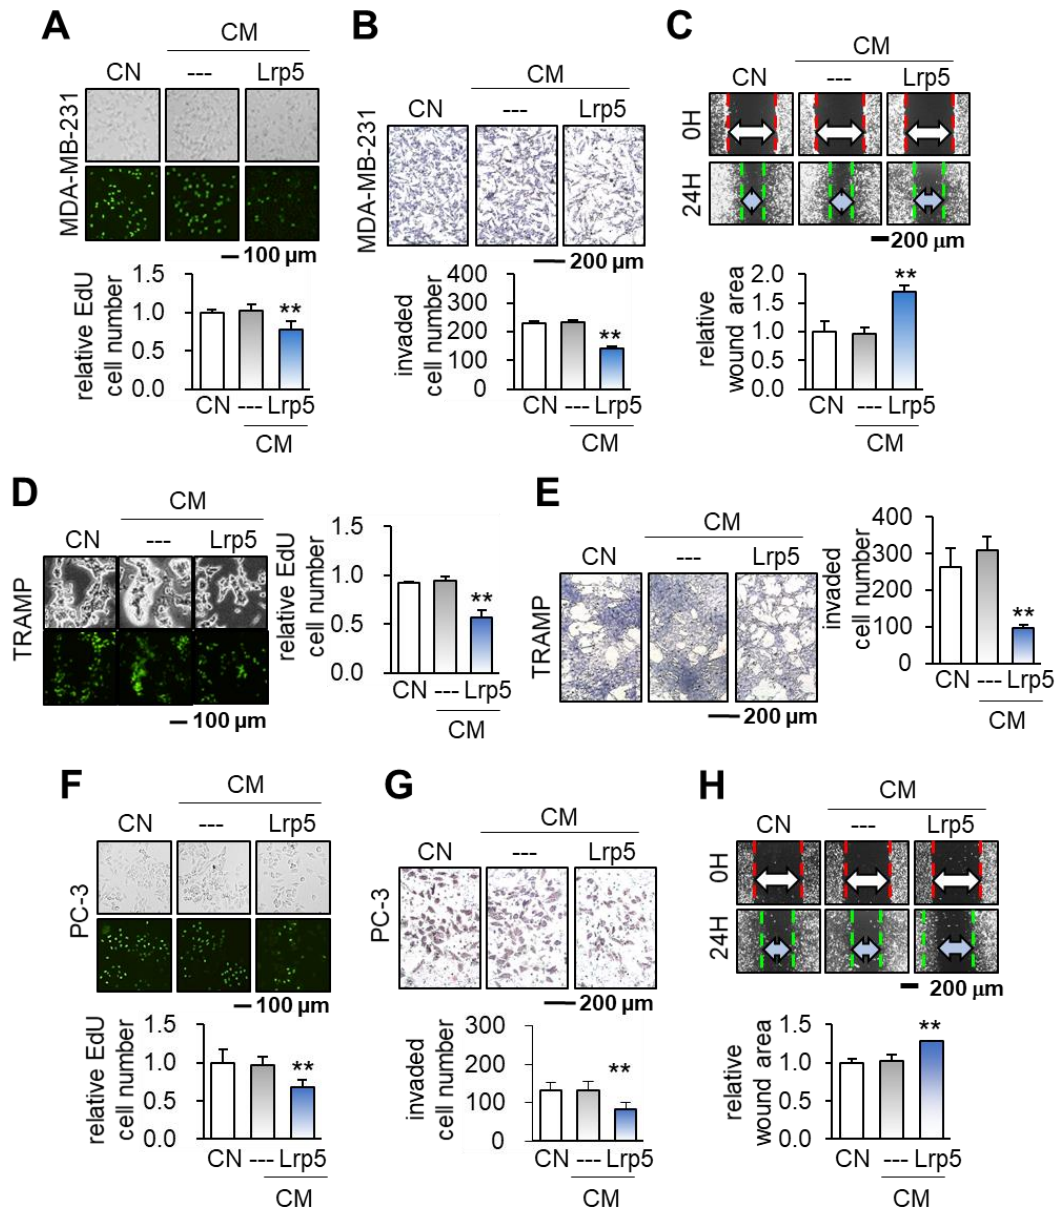

**Figure S2.** Suppression of tumorigenic behaviors of MDA-MB-231 breast cancer cells as well as TRAMP and PC-3 prostate cancer cells by Lrp5 CM. The double asterisk indicates  $p < 0.01$ . **(A-C)** Reduction in the EdU-based proliferation, transwell invasion, and scratch-based migration of MDA-MB-231 breast cancer cells by Lrp5 CM. **(D-E)** Reduction in the EdU-based proliferation and transwell invasion of TRAMP prostate tumor cells by Lrp5 CM. **(F-H)** Reduction in the MTT-based viability, transwell invasion, and scratch-based motility of PC-3 prostate cancer cells by Lrp5 CM.

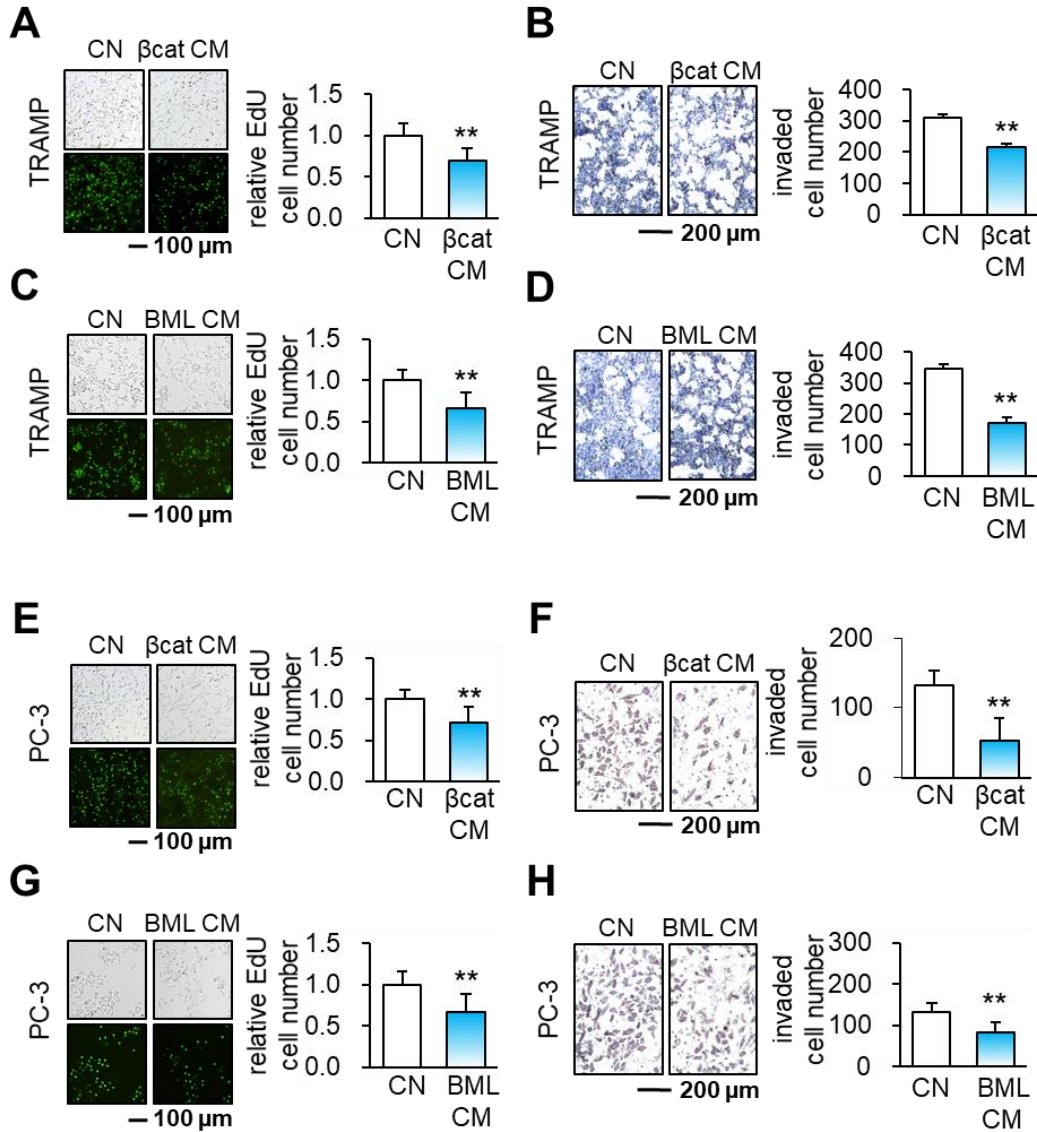

**Figure S3.** Reduction in the EdU-based proliferation, and transwell invasion of TRAMP and PC-3 prostate tumor cells by  $\beta$ -catenin CM and BML284-treated CM. (A-B) TRAMP prostate tumor cells in response to  $\beta$ -catenin CM. (C-D) TRAMP cells in response to BML284-treated CM. (E-F) PC-3 prostate cancer cells in response to  $\beta$ -catenin CM. (G-H) PC-3 cells in response to BML284-treated CM.

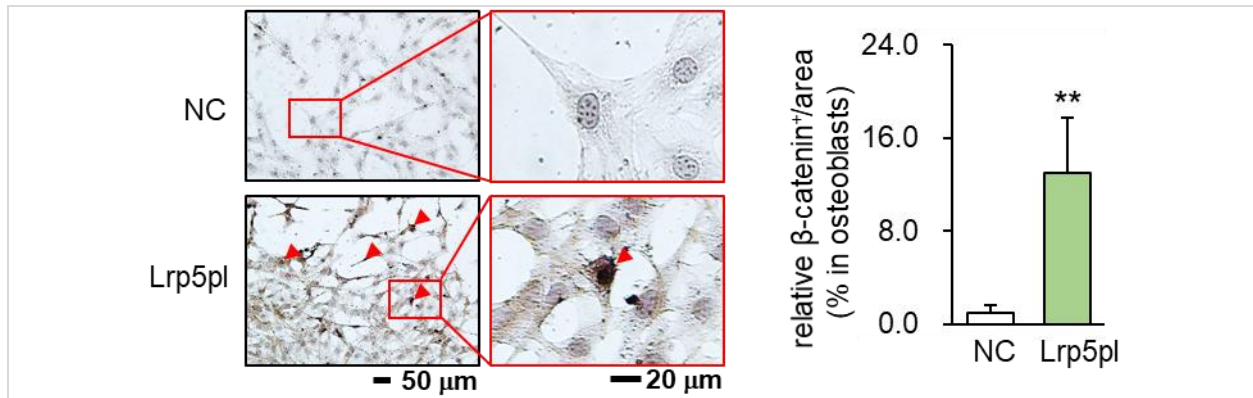

**Figure S4.** Immunohistochemical analysis of osteoblasts with and without Lrp5 overexpression. The upper images are the negative control (NC), while the lower images are Lrp5-overexpressing cells (Lrp5pl). The red arrowheads indicate the region with  $\beta$ -catenin expression (brown staining).

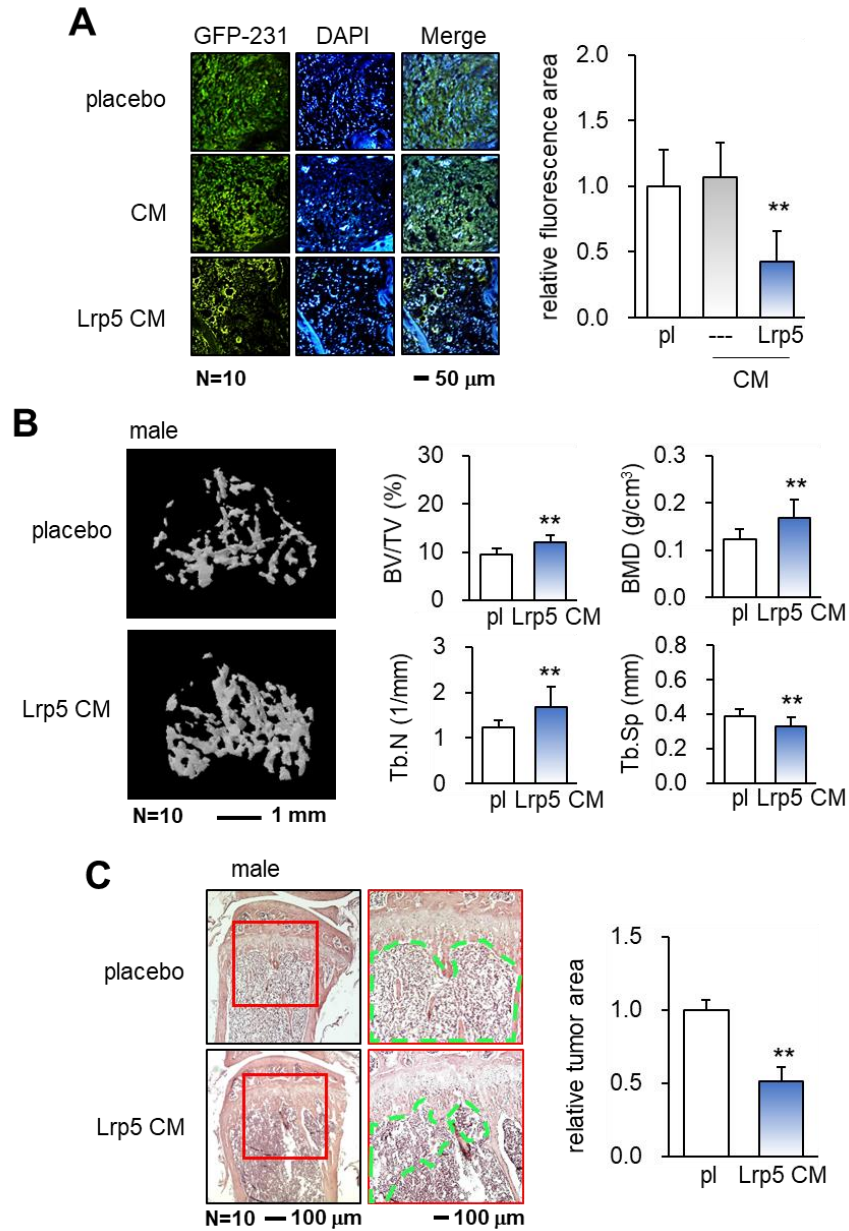

**Figure S5.** Protection of the prostate tumor-invaded bone of C57BL/6 mice by Lrp5 CM. pl = placebo, Lrp5 = Lrp5 overexpression, and CM = osteoblast-derived conditioned medium. The double asterisk indicates  $p < 0.01$ . **(A)** Significant reduction in the tumor-invaded area in the tibia of NOD/SCID/ $\gamma(-/-)$  mice in response to Lrp5-overexpressing human osteoblast-derived CM. **(B)** Inhibition of bone loss in the tumor-invaded tibia by Lrp5 CM. BV/TV = bone volume ratio, BMD = bone mineral density, Tb.N = trabecular number, and Tb.Sp = trabecular separation, N = 10. **(C)** Reduction in the tumor-invaded area (green-outlined region) by the daily administration of Lrp5 CM, N = 10.

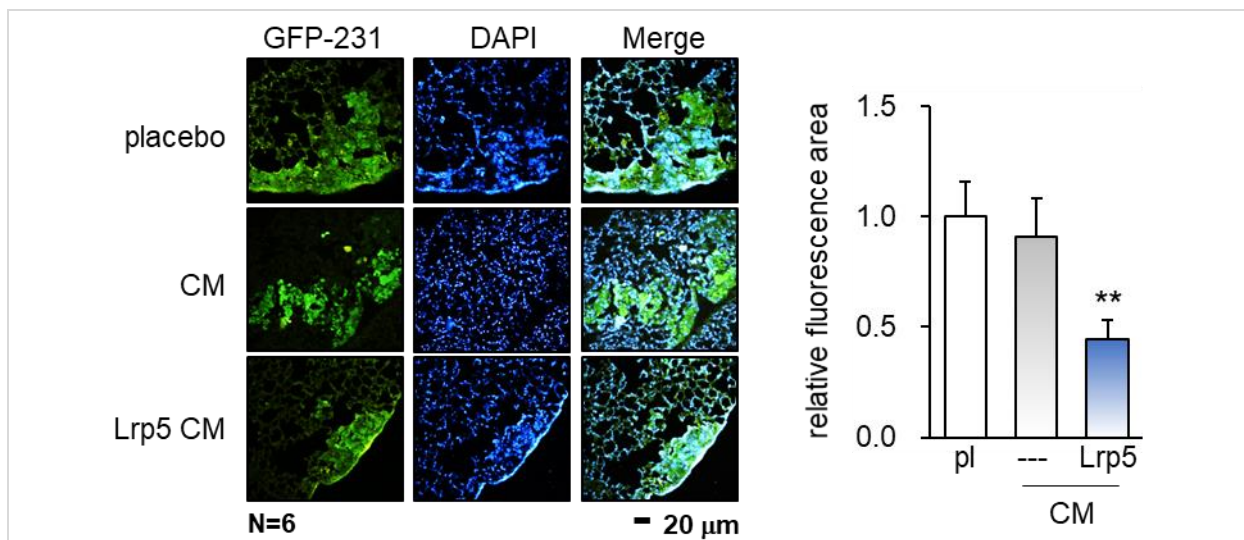

**Figure S6.** Significant reduction in the tumor-invaded area in the lung of NOD/SCID/ $\gamma(-/-)$  mice in response to Lrp5-overexpressing human osteoblast-derived CM.

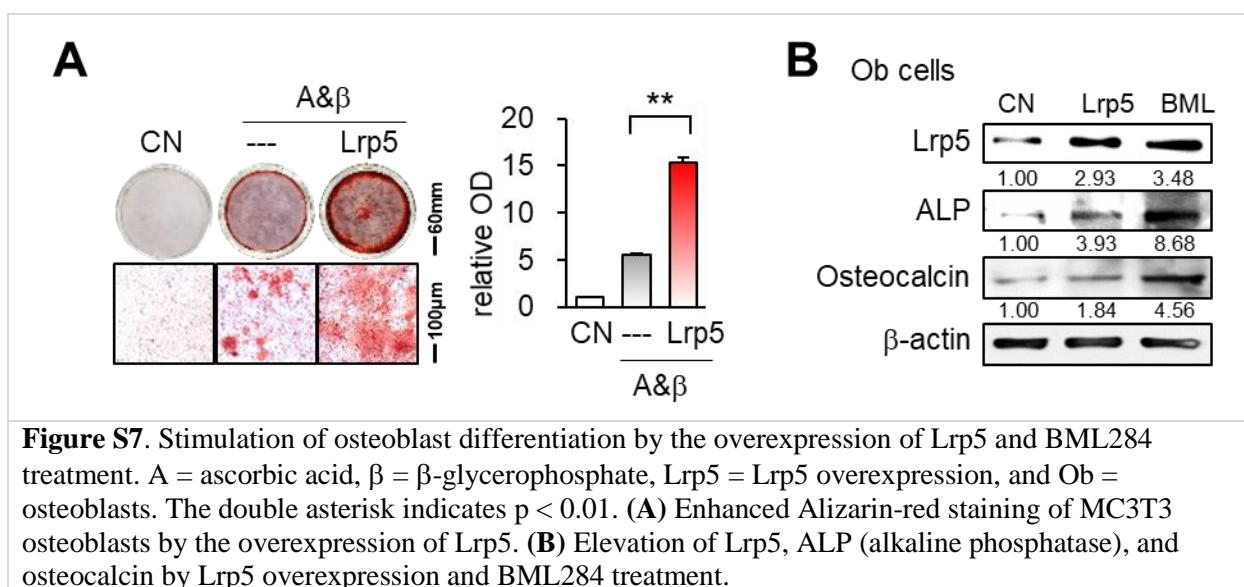

**Figure S7.** Stimulation of osteoblast differentiation by the overexpression of Lrp5 and BML284 treatment. A = ascorbic acid,  $\beta$  =  $\beta$ -glycerophosphate, Lrp5 = Lrp5 overexpression, and Ob = osteoblasts. The double asterisk indicates  $p < 0.01$ . (A) Enhanced Alizarin-red staining of MC3T3 osteoblasts by the overexpression of Lrp5. (B) Elevation of Lrp5, ALP (alkaline phosphatase), and osteocalcin by Lrp5 overexpression and BML284 treatment.

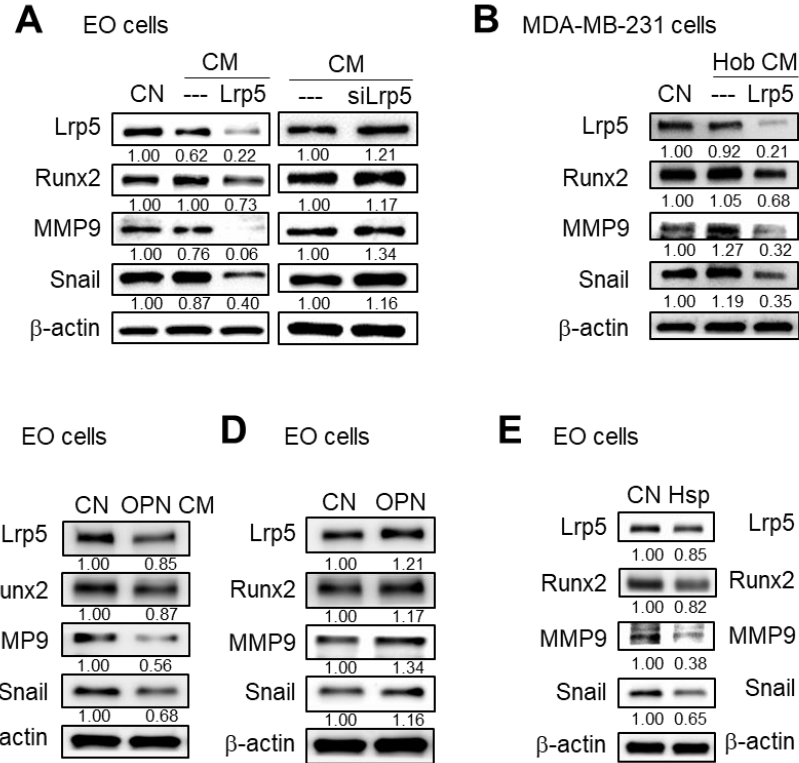

**Figure S8.** Tumor-suppressing effects of Lrp5- overexpressing Ob CM, Hsp90ab1, and MSN, and dichotomous role of osteopontin in EO771 cells. CN = control, EO = EO771 mammary tumor cells, Hob = human osteoblasts, CM = osteoblast-derived conditioned medium, Lrp5 = Lrp5 plasmid, siLrp5 = Lrp5 siRNA, OPN = osteopontin plasmid, Hsp = Hsp90ab1, and MSN = moesin. **(A)** Downregulation of Lrp5, Runx2, MMP9, and Snail in EO771 mammary tumor cells by Lrp5 CM and the elevation by Lrp5-silenced CM. **(B)** Downregulation of Lrp5, Runx2, MMP9, and Snail in MDA-MB-231 mammary tumor cells in response to Lrp5-overexpressing Hob CM. **(C)** Downregulation of Lrp5, Runx2, MMP9, and Snail in EO771 cells by OPN-overexpressing CM. **(D)** Elevation of Lrp5, Runx2, MMP9, and Snail in EO771 cells by the overexpression of OPN. **(E)** Downregulation of Lrp5, Runx2, MMP9, and Snail in EO771 cells by the application of 5  $\mu$ g/mL Hsp90ab1 and MSN.

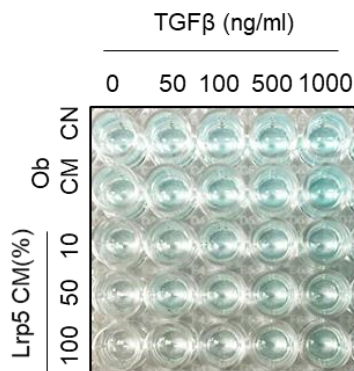

**Figure S9.** Cell ELISA-based stained levels of PDL-1 expression in EO771 tumor cells in response to the gradient of TGF $\beta$  and Lrp5 CM. CN = control, Ob = osteoblasts, L5 = overexpression of Lrp5, and CM = conditioned medium.

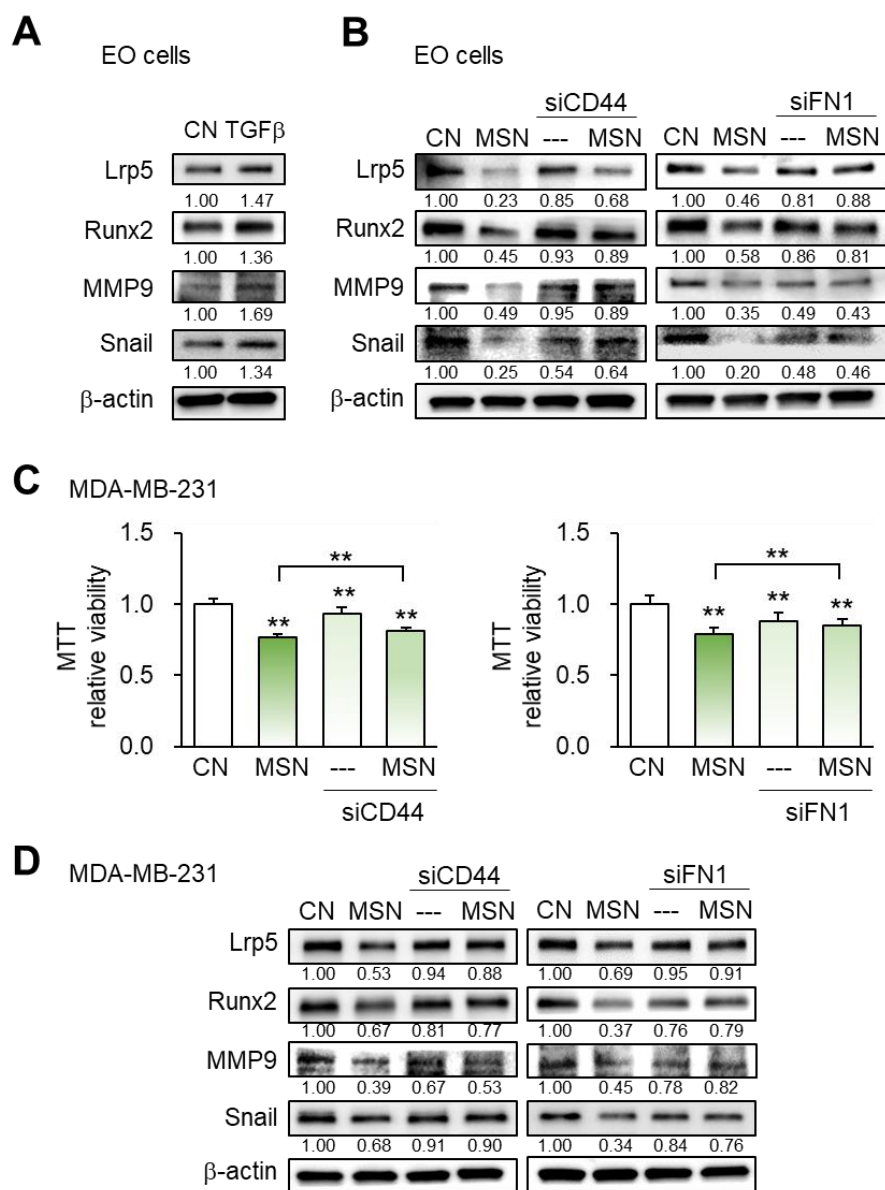

**Figure S10.** Tumor-promoting effect of TGF $\beta$  recombinant proteins, and the anti-tumor effect by silencing CD44 and FN1 in EO771 cells. **(A)** Elevation of Lrp5, Runx2, MMP9, and Snail in EO771 cells by the application of 750 ng/mL TGF $\beta$ . **(B)** Suppression of MSN-mediated downregulation of Lrp5, MMP9, Runx2, and Snail in EO771 cells by RNA silencing of CD44 and FN1. **(C)** Suppression of MSN-mediated inhibition of the proliferation of MDA-MB-231 cells by RNA silencing of CD44 and FN1. **(D)** Suppression of MSN-mediated downregulation of Lrp5, MMP9, Runx2, and Snail in MDA-MB-231 cells by RNA silencing of CD44 and FN1.

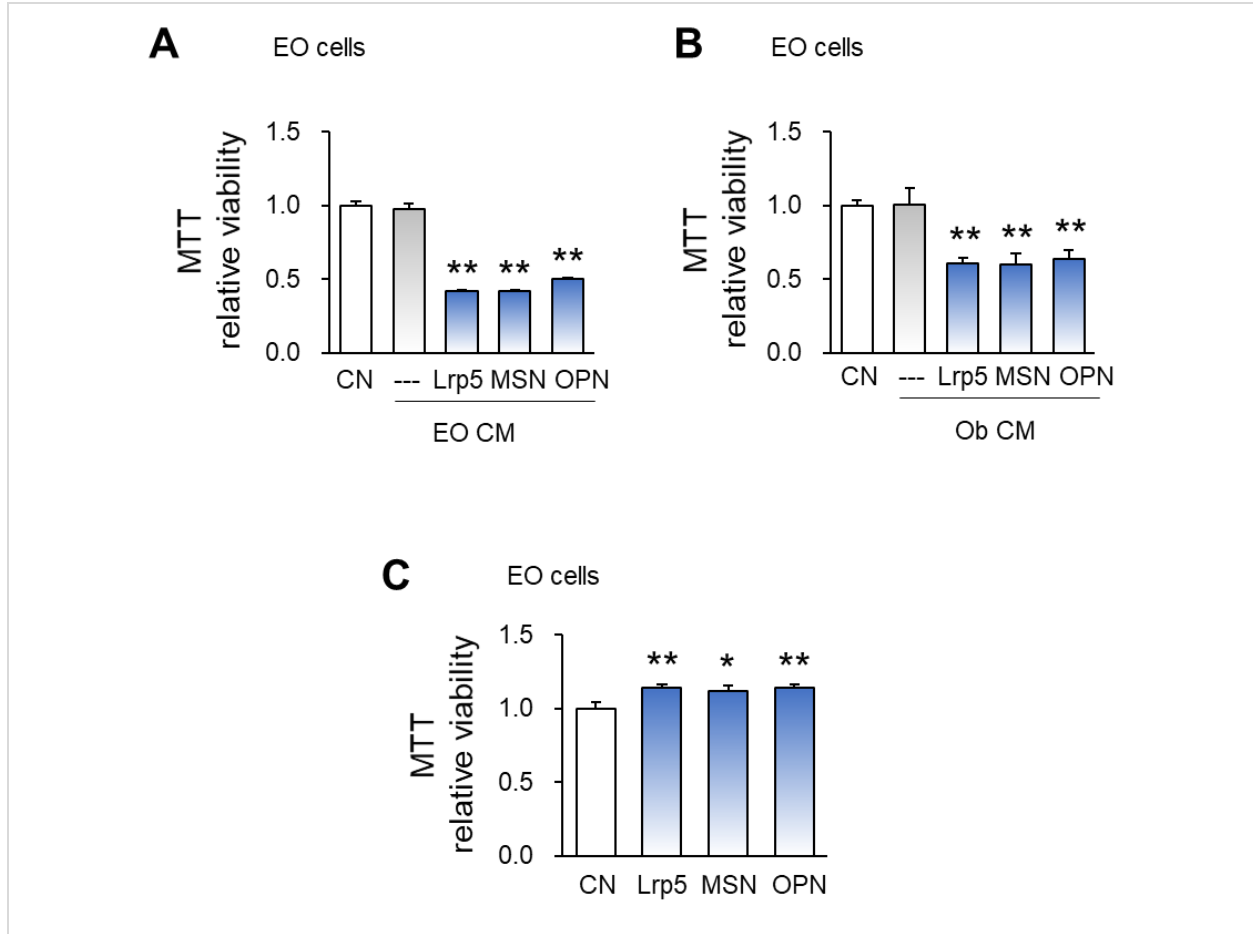

**Figure S11.** Dichotomous role of Lrp5, MSN, and osteopontin in osteoblasts and EO771 mammary tumor cells. CN = control, EO = EO771, Ob = osteoblasts, Lrp5 = overexpression of Lrp5, OPN = overexpression of osteopontin, MSN = overexpression of moesin, and CM = conditioned medium. The single and double asterisks indicate  $p < 0.05$  and  $0.01$ , respectively. **(A)** Reduction in the MTT-based viability by Lrp5-, MSN-, and Osteopontin-overexpressing EO771 tumor cell-derived CMs. **(B)** Reduction in the MTT-based viability by Lrp5-, MSN-, and osteopontin-overexpressing osteoblast-derived CMs. **(C)** Elevation of the MTT-based viability of EO771 tumor cells by the overexpression of Lrp5, MSN, and OPN.
